# Supplementary material for: An interactive murine single-cell atlas of the lung responses to radiation injury
Source: PubMed Central journal article supplement (PMC10147670; doi:10.1038/s41467-023-38134-z), 2023-04-28
Supplement: 41467_2023_38134_MOESM1_ESM.pdf [file 41467_2023_38134_MOESM1_ESM.pdf]

## SUPPLEMENTARY FIGURES

**a**

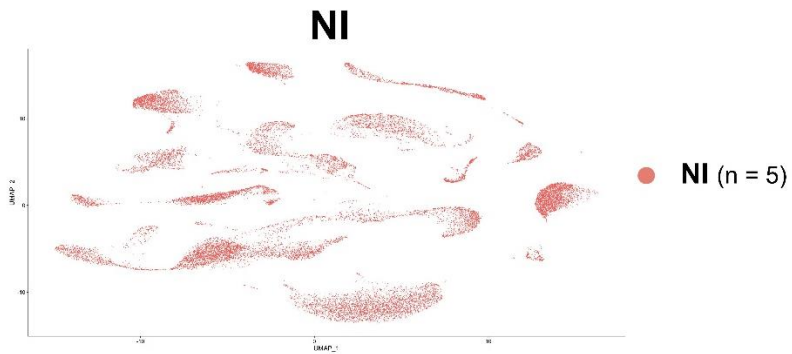

**b**

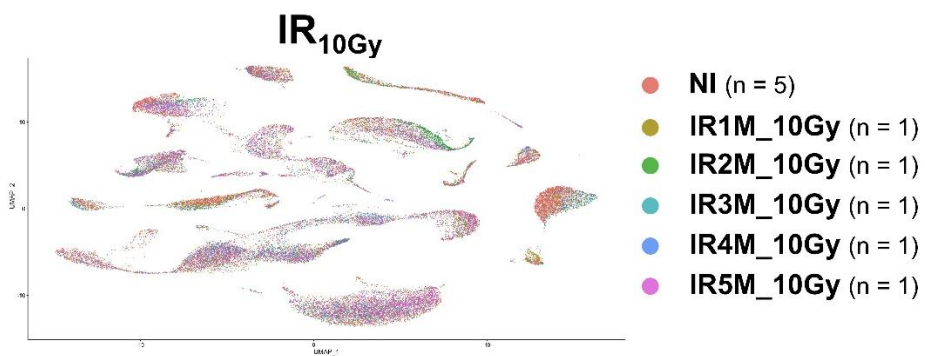

**c**

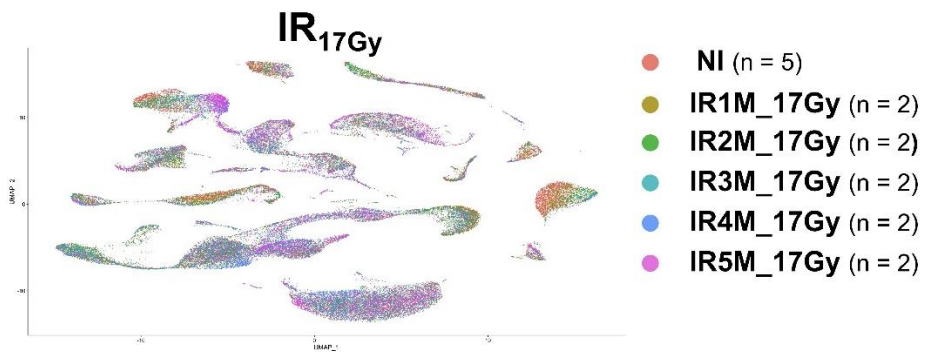

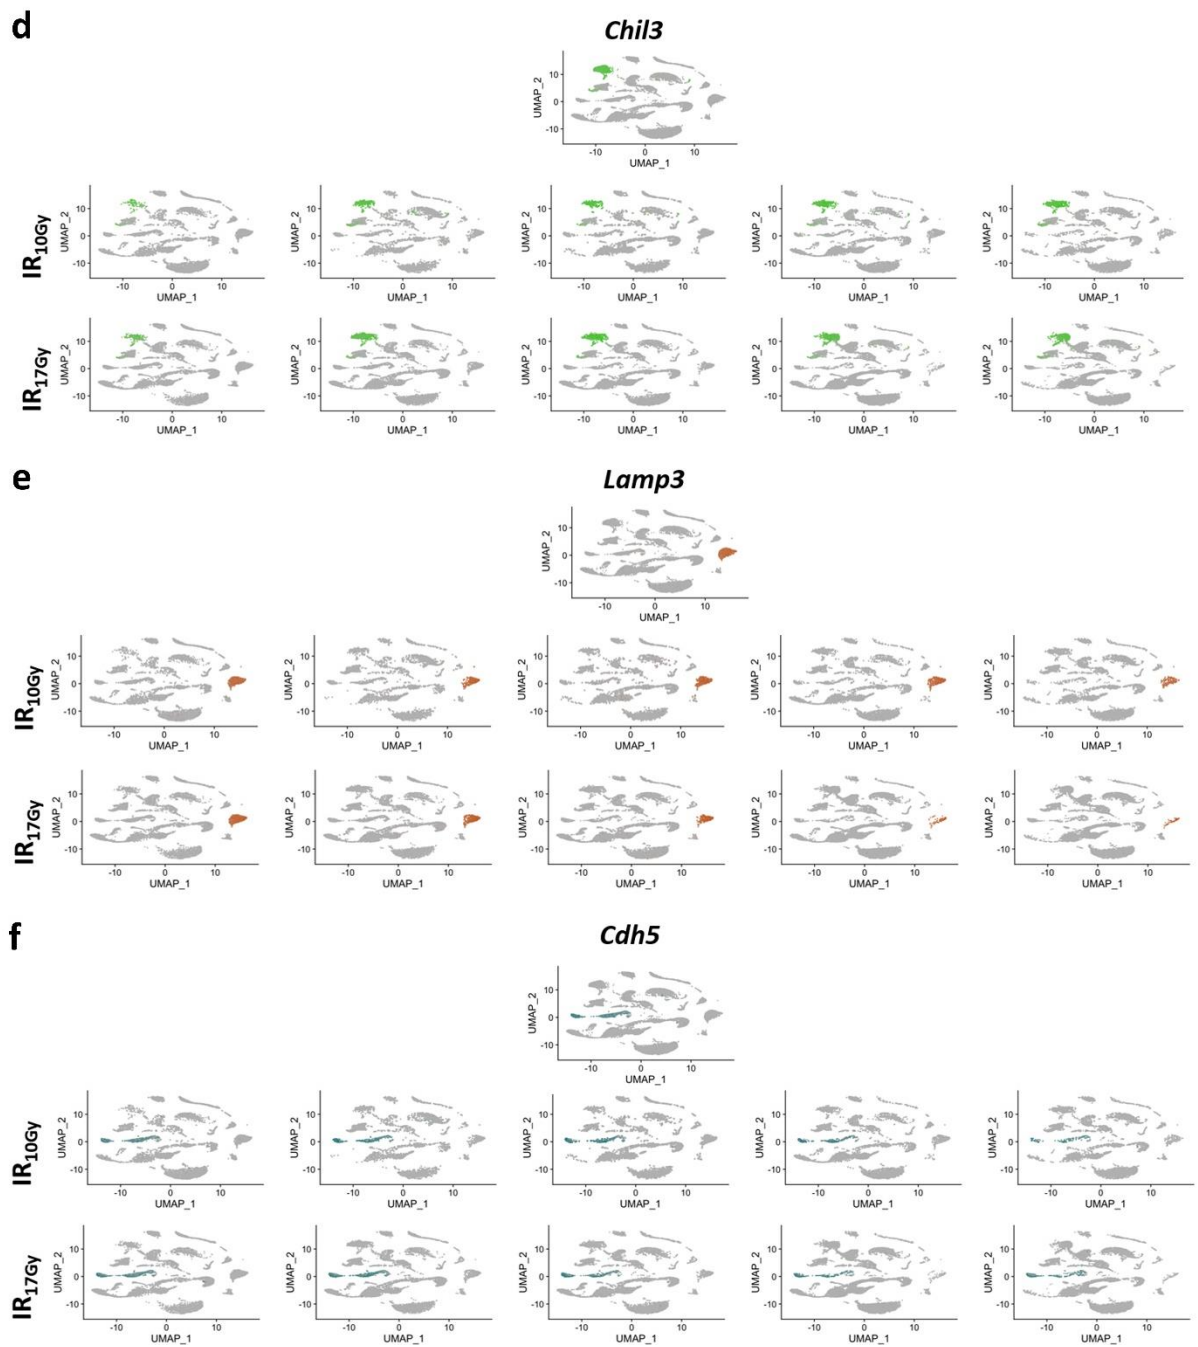

**Supplementary Figure 1. Single-cell data visualization of the NI and IR lungs and cell type specific markers identification.** UMAP visualization from **a** 5 NI samples alone (22,378 cells), **b** 5 NI samples and 5 IR<sub>10Gy</sub> samples from 1 to 5M (one sample per time point) (26,360 cells) and **c** 5 NI samples and 10 IR<sub>17Gy</sub> samples from 1 to 5M (two samples per time point) (54,131 cells). UMAP visualization of *Chil3* **d**, *Lamp3* **e** and *Cdh5* **f** expression in the NI samples and the different time points from 1 to 5 months after IR<sub>10Gy</sub> (n=1) and IR<sub>17Gy</sub> (n=2).

An interactive murine single-cell atlas of the lung responses to radiation injury

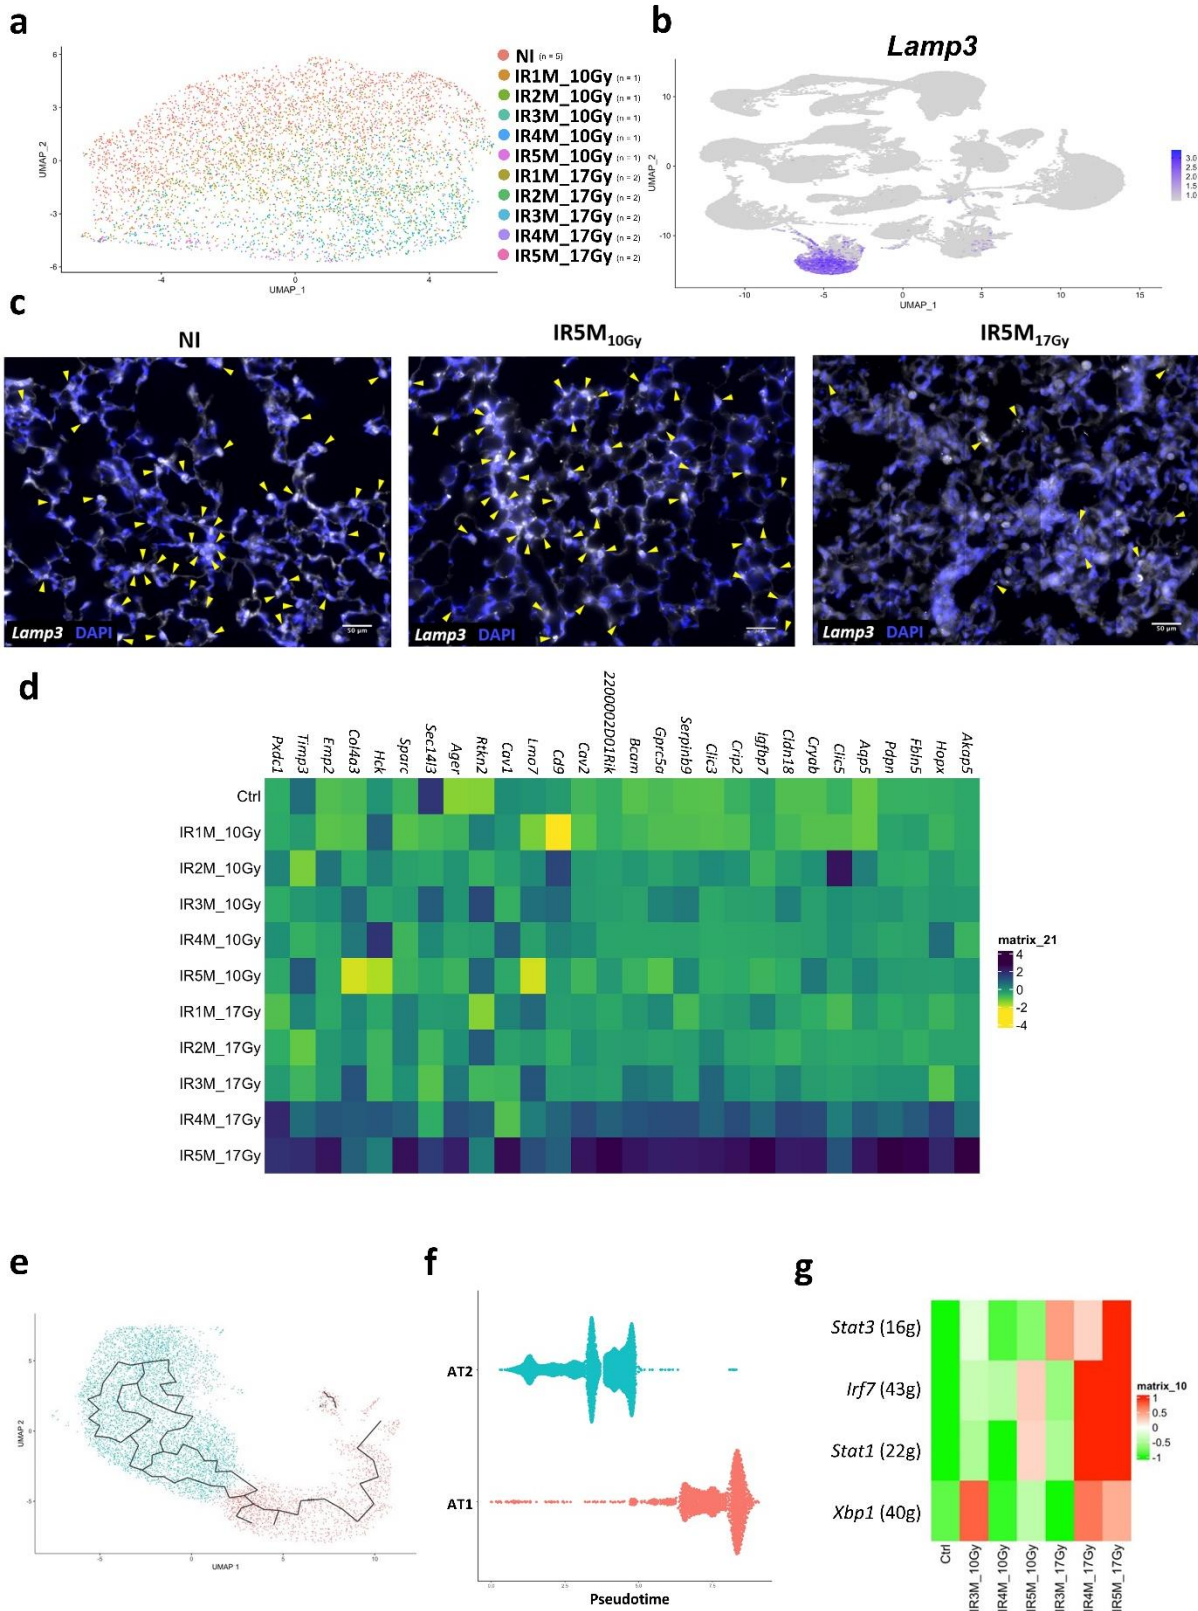

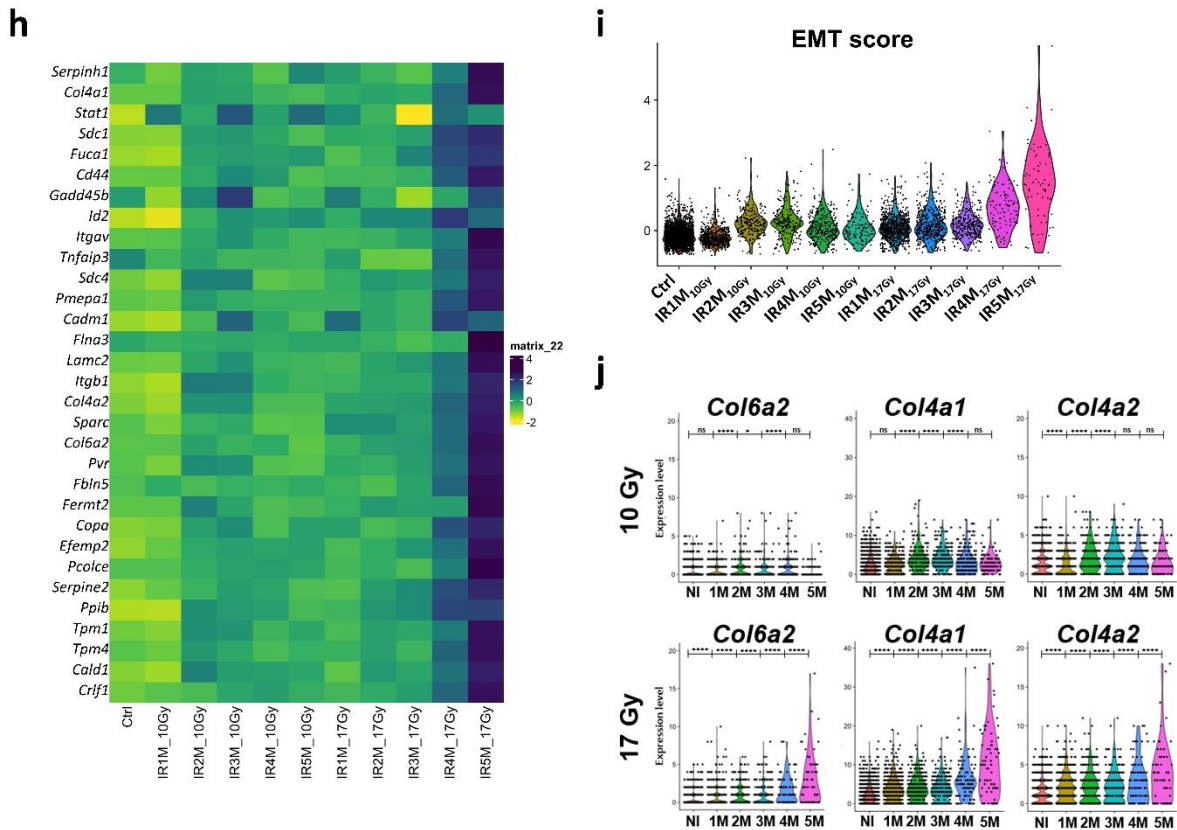

**Supplementary Figure 2. Cellular and molecular characterization of AT2 cells.** **a** UMAP visualization of the 5,550 NI ( $n = 5$ ), IR<sub>10Gy</sub> ( $n = 1$ ) and IR<sub>17Gy</sub> ( $n = 2$ ) AT2 cells annotated by time point. **b** UMAP visualization of the expression of *Lamp3*. **c** *Lamp3* (white) staining in lung tissue sections from NI ( $n = 3$ ), IR5M<sub>10Gy</sub> ( $n = 3$ ) and IR5M<sub>17Gy</sub> ( $n = 5$ ) mice. Sections were counterstained with DAPI (blue). Images are shown as a maximum intensity projection (16 z-stacks, 5  $\mu$ m). Images were acquired using the tiles tool (5x5) on an apotome microscope with a 63X objective. Yellow arrows point at AT2 cells. Scale bars, 50  $\mu$ m. **d** Heatmap of the expression of transdifferentiation related genes in the AT2 cells across the different samples. **e** Monocle trajectory analysis of the AT2 and AT1 clusters. **f** Monocle pseudotime analysis of the AT2 and AT1 cells using the marker genes of the transdifferentiating AT2 cluster 3 to order the cells. **g** Gene Regulatory network analysis of the AT2 cells in the NI samples and 3, 4 and 5 months after IR<sub>10Gy</sub> and IR<sub>17Gy</sub>. **h** Heatmap of the expression of EMT genes in the AT2 cells across the different samples. **i** Violin plot showing the single cell score calculated based on the EMT expressed genes in the AT2 cells. **j** Violin plots of EMT genes expression in the AT2 cells in the NI samples and at the different time points after IR<sub>10Gy</sub> and IR<sub>17Gy</sub>. (n/s, adjusted p-value > 0.05; \*, adjusted p-value < 0.05; \*\*, adjusted p-value < 0.01; \*\*\*, adjusted p-value < 0.001; \*\*\*\*, adjusted p-value < 0.0001).

An interactive murine single-cell atlas of the lung responses to radiation injury

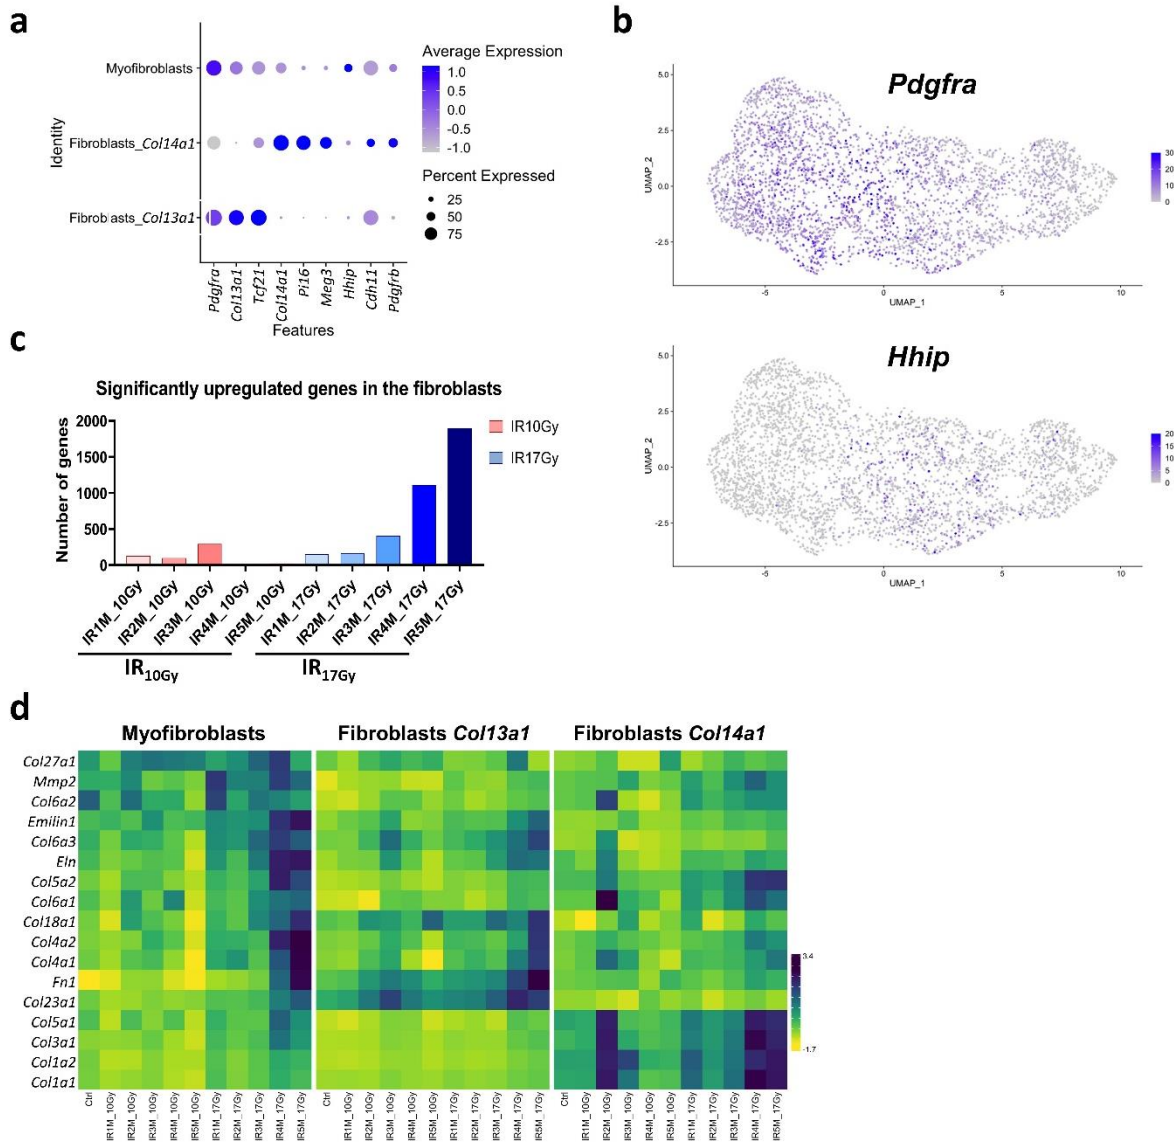

**Supplementary Figure 3. Molecular characterization of the mesenchymal cells.** **a** DotPlot of the expression of the marker genes used to identify the fibroblasts subpopulations: *Col13a1* and *Tcf21* for *Col13a1*+ fibroblasts; *Col14a1*, *Pi16* and *Meg3* for *Col14a1*+ fibroblasts; *Hhip*, *Cdh11* and *Pdgfrb* for myofibroblasts. **b** UMAP visualization of the expression of *Pdgrfa* and *Hhip*. **c** Dynamics in the significantly upregulated genes in the fibroblast subpopulations compared to the NI samples at the different time points after IR10Gy and IR17Gy. **d** Heatmap of the expression of ECM related genes in the fibroblast subpopulations across the different samples.

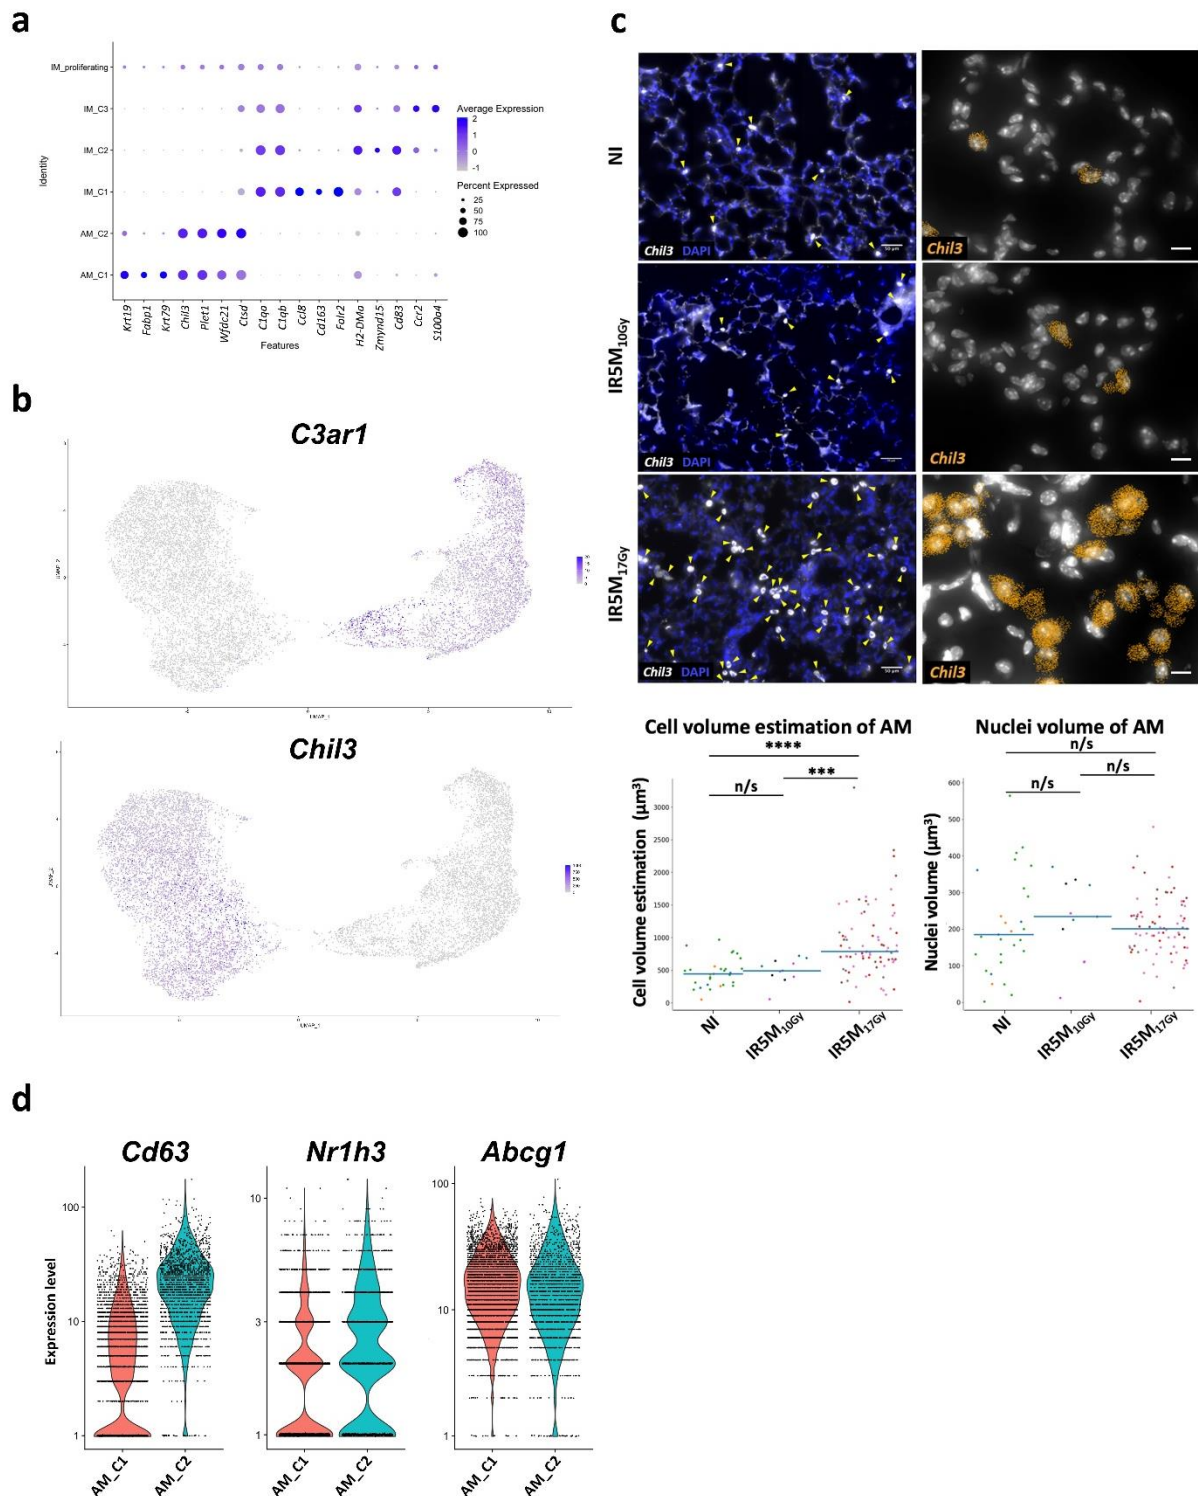

**Supplementary Figure 4. Cellular and molecular characterization of the alveolar and interstitial macrophages.** **a** DotPlot of the expression of the marker genes used to identify the different IM and AM subpopulations. **b** UMAP visualization of the expression of *C3ar1* and *Chil3*. **c** *Chil3* staining in lung tissue sections from NI, IR5M<sub>10Gy</sub> and IR5M<sub>17Gy</sub> mice. Left column: sections were counterstained with DAPI (blue). Images are shown as a maximum intensity projection (16 z-stacks, 5 µm). Images were acquired using the tiles tool (5x5) on an apotome microscope with a 63X objective. Yellow arrows point at AM. Scale bars, 50 µm. Right column: automatic *Chil3* mRNA detection with Big-FISH. Scale bars, 10 µm. Cell and nuclei volume estimation of the *Chil3*<sup>+</sup> cells in NI, IR5M<sub>10Gy</sub> and IR5M<sub>17Gy</sub> lung

tissue sections. To compare two groups, the P-value was computed with the Mann–Whitney–Wilcoxon test (two-sided test) from scipy (n/s, adjusted p-value > 0.05; \*, adjusted p-value < 0.05; \*\*, adjusted p-value < 0.01; \*\*\*, adjusted p-value < 0.001; \*\*\*\*, adjusted p-value < 0.0001). Each dot represents one analyzed image. Each color per time point represents a different biological replicate (NI n = 3; IR5M<sub>10Gy</sub> n = 3; IR5M<sub>17Gy</sub> n = 5). **d** Violin plots of foam genes expression in the different AM subpopulations.

An interactive murine single-cell atlas of the lung responses to radiation injury

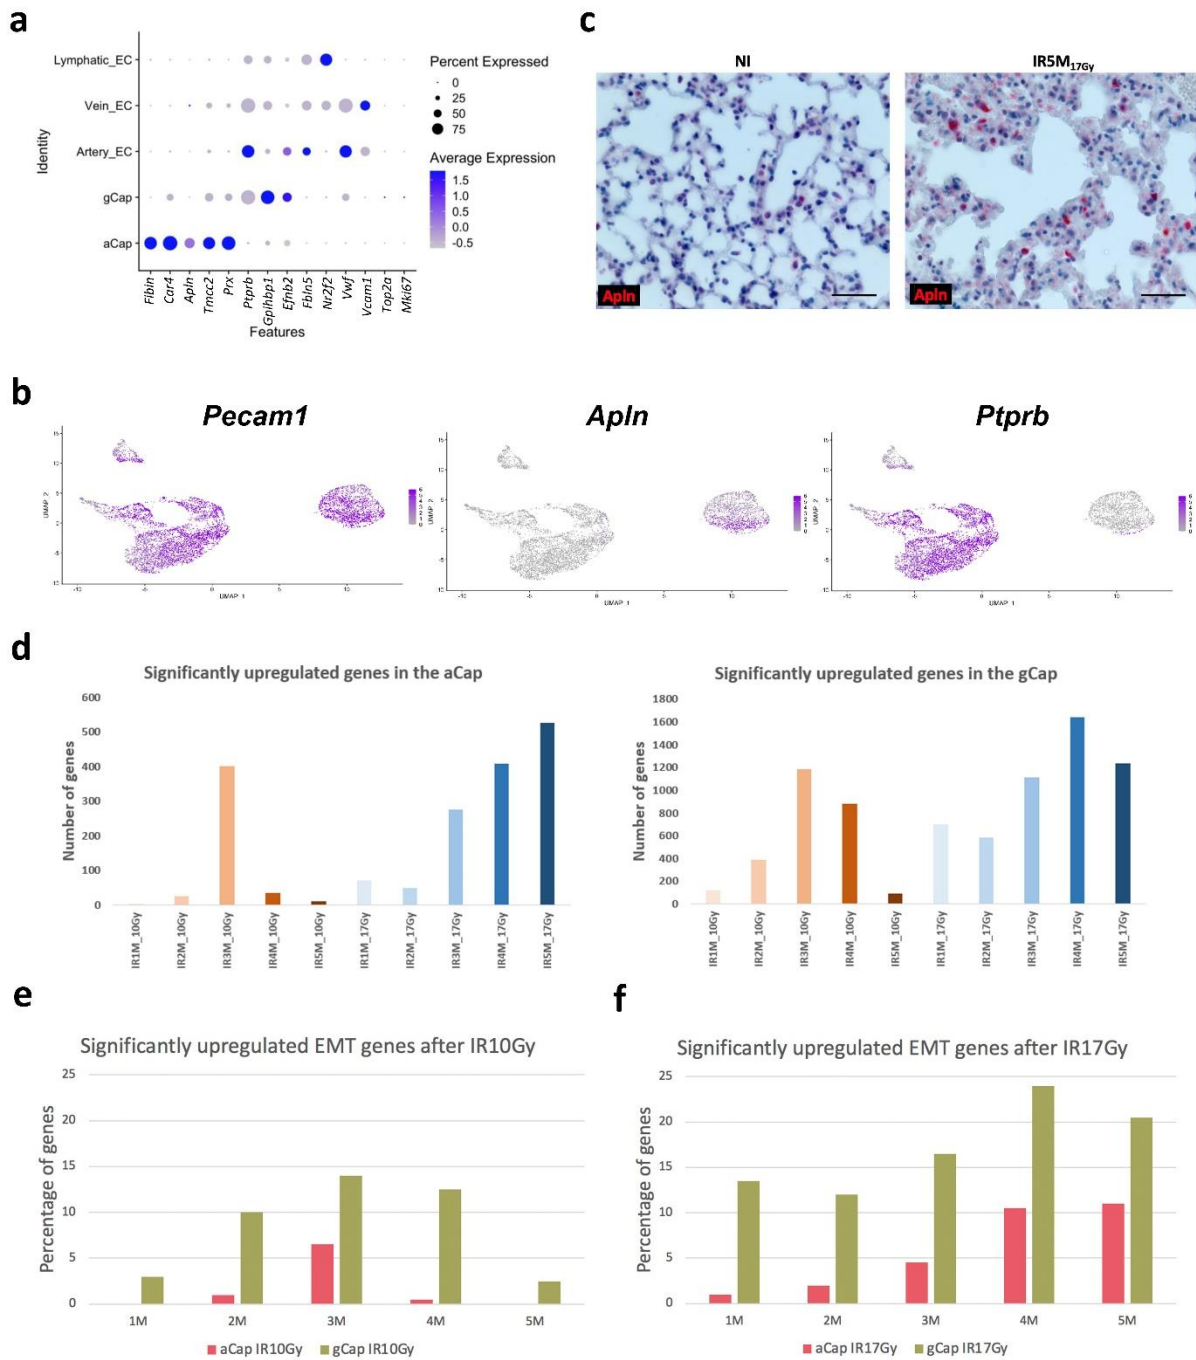

**Supplementary Figure 5. Molecular profile of the different endothelial cell sub-compartments. a** DotPlot of the expression of the marker genes used to identify the different EC subpopulations. **b** UMAP visualization of the expression of *Pecam1*, *Apln* and *Ptpnb*. **c** Immunohistochemistry staining in NI (n = 3) and IR5M<sub>17Gy</sub> (n = 3) lung tissue sections using an anti-Apln antibody (red). Scale bars, 50 μm. **d** Dynamics in the significantly upregulated genes in the aCap and gCap compared to the NI samples at the different time points after IR<sub>10Gy</sub> and IR<sub>17Gy</sub>. Percentage of the significantly upregulated EMT genes at the different time points after IR<sub>10Gy</sub> **e** and IR<sub>17Gy</sub> **f** in the aCap and gCap.



An interactive murine single-cell atlas of the lung responses to radiation injury

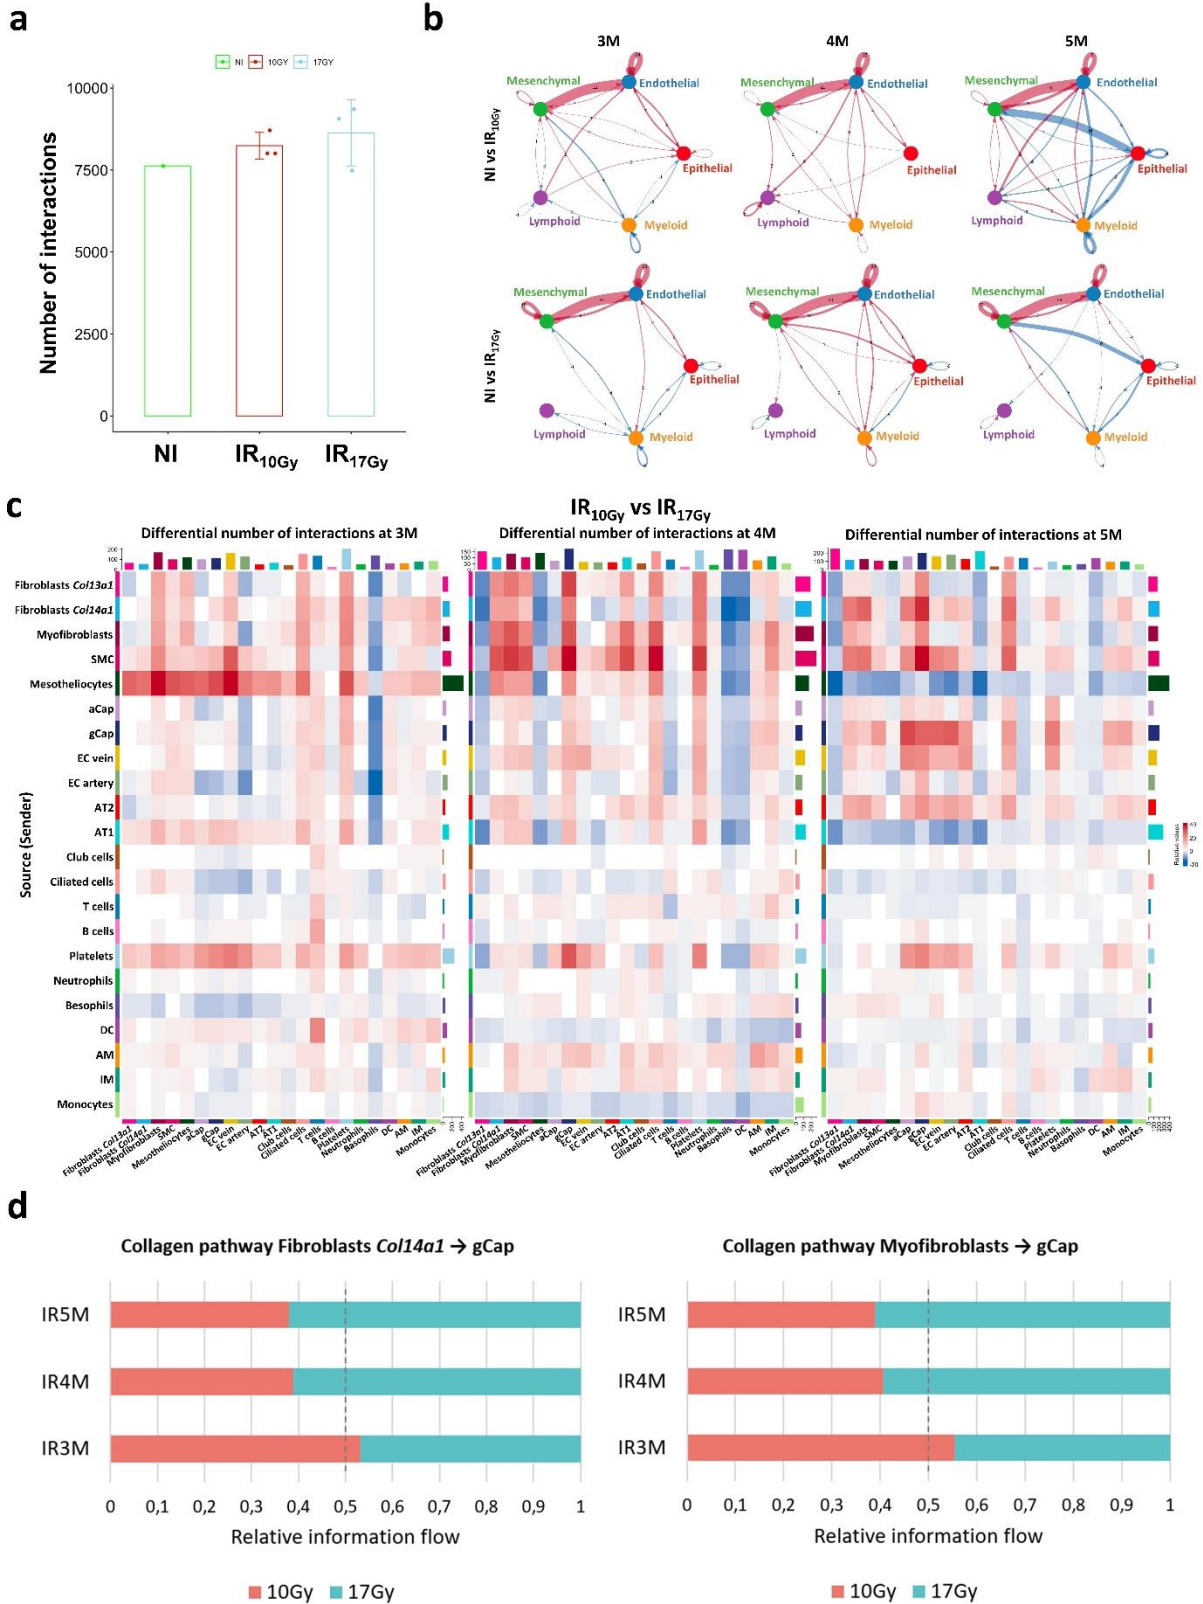

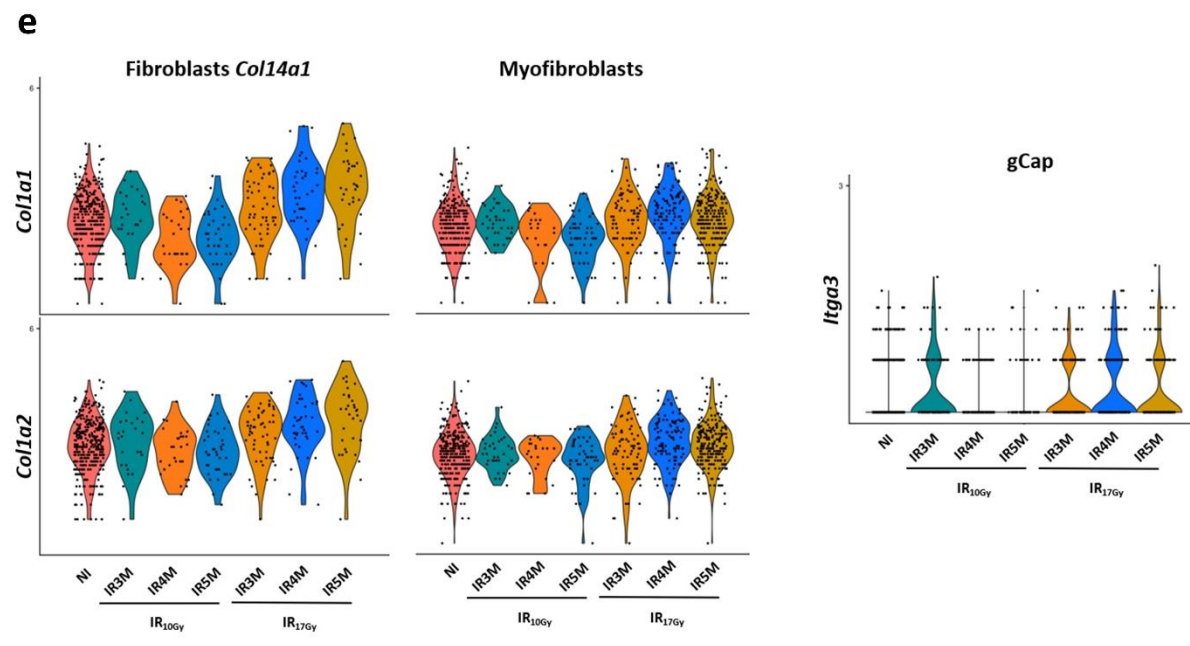

**Supplementary Figure 6. Cell Chat interaction analysis of the major cell compartments.** **a** Mean number of interactions in the NI samples (n=5 mice lungs were pulled together for the analysis) and the 3M, 4M and 5M IR<sub>10Gy</sub> (n=3 mice lung) and IR<sub>17Gy</sub> (n=6 mice lung; 2 samples per time point were pulled together for the analysis) samples. Error bars refer to the standard deviation of the data. **b** Circle plot showing the differential number of interactions between IR<sub>10Gy</sub> and NI and IR<sub>17Gy</sub> and NI in the main cellular compartments at 3M, 4M and 5M post-IR: mesenchymal, endothelial, epithelia, myeloid and lymphoid. Red (or blue) colored edges represent increased (or decreased) signaling in the IR compared to the NI. **c** Heatmap showing the differential number of interactions between IR<sub>10Gy</sub> and IR<sub>17Gy</sub> in all the different lung subpopulations at 3M, 4M and 5M post-IR. Red (or blue) represents increased (or decreased) signaling in the IR<sub>17Gy</sub> compared to the IR<sub>10Gy</sub>. The top-colored bar plot represents the sum of column of values displayed in the heatmap (incoming signaling). The right colored bar plot represents the sum of row of values (outgoing signaling). **d** Dynamics of the relative information flow of the Collagen pathway from 3 to 5 months post-IR from the Fibroblasts *Col14a1* and Myofibroblasts to the gCap. **e** Gene expression distribution of signaling genes related to the Collagen pathway in the NI samples and 3M, 4M and 5M after IR<sub>10Gy</sub> and IR<sub>17Gy</sub>: *Col1a1* and *Col1a2* ligands in Fibroblasts *Col14a1* and Myofibroblasts; *Itga3* receptor in gCap.

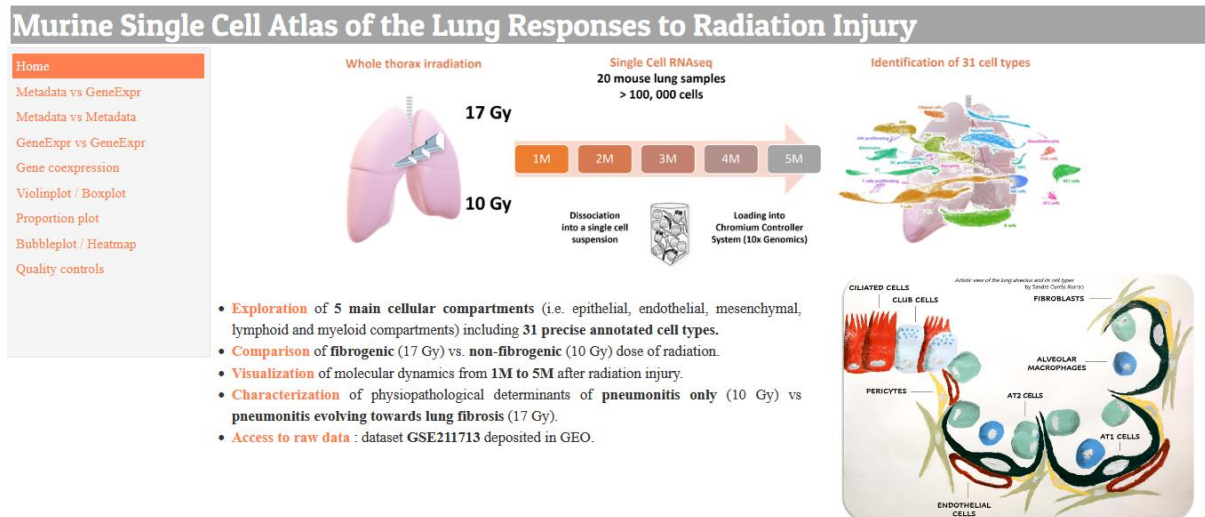

**Supplementary Figure 7. Interactive Mouse Radio-induced Pulmonary Fibrosis Atlas webpage.** Outline of the homepage of the interactive webpage containing the open-access transcriptomic data for all the scientific community. Bottom left image is an artistic view of the alveolus realized by Sandra Currás-Alonso. The website has been designed by Sophie Heinrich using the *ShinyCell* package.
